# Supplementary material for: How tank-mix adjuvant type and concentration influence the contact angle on wheat leaf surface
Source: PeerJ. 2023 Nov 21;11:e16464. doi: 10.7717/peerj.16464 (PMC10668805; doi:10.7717/peerj.16464)
Supplement: Supplemental Information 6 [file peerj-11-16464-s006.xlsx]

## Sheet: 1‰-5‰mean
	1‰		2‰		3‰		4‰		5‰		Tap-water
Time [s]	Mean	SE	mean	SE	Mean	SE	Mean	SE	mean	SE
0	63.95	2.03581	61.31	0.911062	56.1567	0.670729	48.6033	2.00859	53.1167	2.28037	144.33	0.7292
0.07	61.2833	1.37921	58.0733	3.16136	51.3267	1.68654	42.8167	6.09353	49	2.10031	139.732	5.3717
0.14	58.83	0.973721	51.8533	2.37007	44.1433	1.92458	37.5067	5.58657	41.2167	1.15956	144.083	1.04667
0.22	57.0133	1.09682	48.2733	1.78312	39.1533	2.61009	33.6133	5.49065	35.84	1.33949	146.54	2.19475
0.29	55.1767	1.25372	45.1033	2.10176	35.8	2.04727	31.39	5.02611	31.3833	0.945874	142.197	0.857561
0.36	54.12	0.927146	41.2	1.54303	33.34	1.44108	29.1767	4.84151	28.4733	1.01902	143.677	1.76923
0.43	52.6033	0.657428	38.5767	1.37335	30.9267	0.945204	27.4467	3.7698	26.17	0.699452	140.073	3.03276
0.5	51.92	0.640026	36.6833	1.42677	26.9633	1.93203	25.7467	3.14829	24.2733	0.914792	143.297	0.85795
0.58	50.09	0.86539	34.6133	1.10052	23.78	2.6902	24.1	2.92662	23.0567	1.12382	139.4	3.0862
0.65	49.1467	1.57926	32.6	0.829277	22.6033	2.24012	23.75	1.86723	21.8233	1.69462	143.467	1.03565
0.72	48.5433	1.52615	30.42	0.492172	21.37	2.09381	20.6667	2.32353	21.0433	1.91439	142.663	1.54952
0.79	47.5667	1.50601	28.1367	0.576927	20.92	1.20972	19.53	2.15194	20.8167	2.06896	141.823	2.37327
0.86	46.6567	1.51226	27.5133	0.14678	20.3833	0.940679	17.4267	2.62286	20.25	1.93314	143.123	1.16356
0.94	46.0367	1.63732	25.4467	0.62336	19.38	0.955842	16.3267	2.53786	19.7933	1.96012	143.093	1.6424
1.01	44.94	1.75229	24.2667	0.768339	18.6733	0.929235	15.2967	2.37471	19.0333	1.65683	143.757	0.774797
1.08	44.1767	1.73188	24.0367	1.1257	18.2833	0.990998	14.1033	2.36114	18.5633	1.92365	142.393	1.84788
1.15	43.38	1.73394	22.8167	1.14288	17.8933	0.898171	13.6033	2.43848	17.71	1.79424	142.847	1.80272
1.22	42.6633	1.75176	22.1067	1.27345	17.6467	1.02333	13.2033	2.36401	16.9733	1.66896	142.74	1.52923
1.3	41.7067	1.79682	21.24	1.49192	16.02	2.31046	12.88	2.15078	16.0067	2.60856	143.537	0.936471
1.37	41.0167	1.82249	20.1	1.40058	15.48	2.31781	12.73	2.07906	15.8167	2.6348	143.14	1.19976
1.44	40.0333	1.84732	19.1967	1.2354	15.3033	2.36307	12.4367	1.96978	15.87	3.11087	142.813	1.51338
1.51	39.2	1.905	18.7633	1.77862	14.83	2.46188	12.3767	2.02834	16.3333	2.54648	142.63	1.53663
1.58	38.4933	1.89237	18.0833	1.78244	14.48	2.41851	11.7733	1.92888	16.2767	2.19158	142.84	1.3299
1.66	37.72	1.88283	17.6567	1.87858	14.0167	2.28919	11.5967	1.98084	15.4367	1.65708	143.317	0.933262
1.73	36.99	1.82659	16.1133	1.50972	13.7133	2.22706	11.4167	1.80588	15.3333	1.84071	142.947	1.32291
1.8	36.3967	1.73452	15.6633	1.49672	13.34	2.26012	11.1533	1.8181	14.9033	2.52249	143.03	1.39687
1.87	35.7333	1.66045	15.6433	1.72646	13.0233	2.4409	11	1.77288	14.1367	2.74314	142.55	1.58035
1.94	35.0867	1.64279	14.7233	1.68806	12.6667	2.54324	10.63	1.63037	13.5167	2.65045	143.127	1.15883
2.02	34.4033	1.5461	14.61	1.60864	12.5633	2.49772	10.4533	1.72983	13.3333	3.04067	143.047	1.26652
2.09	33.7667	1.47438	14.2	1.63268	12.1567	2.76283	10.09	1.56289	11.9667	3.96376	143.117	1.22961
2.16	33.2367	1.38801	13.8267	1.81109	12.4333	2.62329	9.34333	1.56296	11.1167	4.61338	142.813	1.41283
2.23	32.71	1.36525	14.1567	2.2436	12.13	2.38777	8.43667	1.02803	10.7433	4.7834	142.733	1.4353
2.3	32.3967	1.28967	13.5467	2.23884	11.3067	2.63282	7.67667	0.677061	10.78	4.60813	143.197	1.20495
2.38	31.9333	1.1915	12.8567	2.1137	11.6567	2.67835	7.04	0.890337	10.4333	4.30461	142.907	1.26905
2.45	31.5467	1.19407	12.7367	2.03518	11.03	2.81846	6.64	1.13602	9.73667	4.2799	142.847	1.30336
2.52	30.9133	1.27489	11.5167	2.43238	9.40667	3.49179	6.49333	0.948355	9.56	4.39102	142.763	1.3857
2.59	30.5467	1.20325	11.3067	2.29052	9.07667	3.45324	6.87667	0.372574	9.42	4.62074	143.047	1.23079
2.66	30.1567	1.09388	10.49	1.65095	8.77	3.64577			8.46667	4.71226	142.99	1.26097
2.74	29.8	1.01402	10.4267	1.79576	8.31	3.69492			9.00667	4.50656	142.88	1.20567
2.81	29.4633	0.949462	11.2567	2.10378	7.87	3.77267			9.3	4.40542	142.773	1.33417
2.88	28.7767	0.725588	10.7233	1.25263	7.52667	3.78247			8.82667	4.41122	142.863	1.28572
2.95	28.42	0.733848	9.95	1.93975					8.18333	4.00376	142.913	1.28468
3.02	27.7033	0.917993	9.64667	1.98375					8.28667	3.88319	142.997	1.20185
3.1	27.2467	0.881974	9.17333	1.77252					8.17	3.75672	142.883	1.24035
3.17	26.9733	0.664939							10.54	3.22516	142.857	1.32268
3.24	26.55	0.601775							8.365	4.47032	142.947	1.31322
3.31	26.2133	0.530451							8.275	4.25803	143.037	1.28791
3.38	26.0633	0.363333							7.955	4.90306	143.067	1.26244
3.46	25.7933	0.338099									142.883	1.29309
3.53	25.4533	0.383159									142.983	1.32255
3.6	25.2867	0.308022									142.9	1.29326
3.67	24.86	0.225019									142.97	1.22202
3.74	24.48	0.226495									142.93	1.30067
3.82	24.25	0.217025									142.91	1.29585
3.89	23.3533	0.666242									142.927	1.3412
3.96	23.81	0.255147									142.92	1.26083
4.03	23.48	0.21166									142.943	1.27138
4.1	23.2133	0.161795									142.94	1.30296
4.18	22.82	0.247049									142.867	1.25215
4.25	22.7333	0.170326									142.99	1.29317
4.32	22.4433	0.247745									142.92	1.28103
4.39	22.2967	0.198858									142.937	1.29949
4.46	21.9567	0.186577									142.947	1.24606
4.54	21.5733	0.11865									142.91	1.27988
4.61	21.31	0.162891									142.867	1.26349
4.68	21.1433	0.169542									142.95	1.30715
4.75	20.85	0.0793725									142.897	1.22857
4.82	20.53	0.187705									142.883	1.20457
4.9	20.35	0.170392									142.937	1.22455
4.97	20.1533	0.155063									142.903	1.24978
5.04	19.7567	0.190992									142.933	1.29843
5.11	19.5167	0.293504									142.957	1.27668
5.18	19.3533	0.238421									142.867	1.2406
5.26	19.1767	0.224301									142.85	1.24069
5.33	19.04	0.285365									142.873	1.29185
5.4	18.8467	0.273821									142.917	1.25847
5.47	18.44	0.155671									142.937	1.32793
5.54	18.46	0.205183									142.903	1.24494
5.62	18.3	0.176163									142.963	1.26899
5.69	18.1367	0.210739									142.977	1.26387
5.76	17.9467	0.203497									142.937	1.26203
5.83	17.7367	0.245651									142.963	1.29751
5.9	17.5533	0.150702									142.88	1.25914
6.05	17.35	0.259679									142.863	1.24727
6.12	17.0633	0.226593									142.94	1.29325
6.19	16.8167	0.318137									142.933	1.27112
6.26	15.0633	1.49262									142.957	1.23965
6.34	16.0067	0.522824									142.96	1.25914
6.41	15.73	0.60696									142.97	1.3095
6.48	15.5367	0.606804									142.923	1.28585
6.55	15.22	0.531445									142.953	1.25375
6.62	15.0767	0.46563									142.92	1.24649
6.7	14.9633	0.528278									142.917	1.28013
6.77	14.5633	0.539022									142.96	1.29423
6.84	14.1867	0.627092									142.917	1.26568
6.91	14.1667	0.5393									142.927	1.29304
6.98	13.9567	0.584988									142.91	1.27996
7.06	13.7167	0.596778									142.86	1.25044
7.13	13.5633	0.679714									142.933	1.26354
7.2	13.3967	0.614663									142.917	1.28991
7.27	13.1167	0.572839									142.91	1.28099
7.34	12.9333	0.642919									142.843	1.2646
7.41	12.7667	0.594203									142.887	1.257
7.49	12.6067	0.562623									142.233	1.71228
7.56	12.3867	0.441752									142.863	1.29411
7.63	12.21	0.456545									142.93	1.32349
7.7	12.07	0.425323									142.94	1.321
7.77	11.9733	0.484436									142.917	1.32353
7.85	11.87	0.599083									142.877	1.27281
7.92	11.7367	0.386839									142.993	1.3198
7.99	11.5567	0.381939									142.9	1.32378
8.06	11.5233	0.482712									142.92	1.32455
8.13	11.4367	0.451565									143.01	1.32685
8.21	11.4933	0.45725									142.87	1.31761
8.28	11.11	0.603517									142.88	1.28535
8.35	11.1033	0.646383									142.95	1.28969
8.42	11.1033	0.426002									142.913	1.30453
8.49	11.14	0.441928									142.993	1.27567
8.57	10.9967	0.4191									142.937	1.25367
8.64	10.9233	0.424513									142.913	1.28639
8.71	10.7	0.435775									142.947	1.25887
8.78	10.7033	0.40769									142.8	1.24712
8.85	10.6367	0.456995									142.93	1.27996
8.93	10.4967	0.391762									142.953	1.29038
9	10.37	0.400666									142.877	1.28136
9.07	9.97667	0.794677									142.883	1.23964
9.14	9.95333	0.755697									142.857	1.3008
9.21	9.81667	0.735671									142.87	1.25588
9.29	9.28	0.850353									142.88	1.26028
											142.883	1.2671
											142.873	1.25039
											142.897	1.24277
											142.843	1.28214
											142.88	1.25636
											142.87	1.20785
											142.883	1.26788
