# Supplementary material for: How tank-mix adjuvant type and concentration influence the contact angle on wheat leaf surface
Source: PeerJ. 2023 Nov 21;11:e16464. doi: 10.7717/peerj.16464 (PMC10668805; doi:10.7717/peerj.16464)
Supplement: Supplemental Information 8 [file peerj-11-16464-s008.xlsx]

## Sheet: 10%-16%mean
	0.1		0.12		0.14		0.16		Tap-water
Time [s]	mean	SE	mean	SE	mean	SE	mean	SE
0	81.6975	5.26191	60.04	3.90731	69.815	6.51191	83.3933	6.47698	144.33	0.7292
0.07	77.17	2.9933	57.79	1.84524	65.185	4.87209	79.5133	5.67537	139.732	5.3717
0.14	73.25	2.67628	58.2925	2.26093	62.6075	2.59104	77.1667	4.26869	144.083	1.04667
0.22	72.5925	2.66879	57.22	1.87958	62.9325	3.29343	76.5467	5.27469	146.54	2.19475
0.29	71.795	2.63396	57.095	2.02058	61.88	2.85634	75.88	5.09862	142.197	0.857561
0.36	71.3175	2.72279	56.55	1.98034	61.5825	2.8147	75.6533	4.80361	143.677	1.76923
0.43	70.745	2.74524	56.275	1.97862	61.2425	2.74341	75.3767	4.65813	140.073	3.03276
0.5	70.1075	2.73562	55.9425	1.99027	60.685	2.59672	74.98	4.60105	143.297	0.85795
0.58	69.5775	2.722	55.6225	1.94684	60.1925	2.47458	74.5167	4.50331	139.4	3.0862
0.65	69.09	2.76387	55.3325	1.89611	59.2825	2.03291	74.01	4.48253	143.467	1.03565
0.72	68.875	2.73732	55.08	1.8456	58.89	1.93557	72.9733	4.44315	142.663	1.54952
0.79	68.52	2.79013	54.74	1.86694	58.57	1.98244	72.0867	4.44896	141.823	2.37327
0.86	68	2.52976	54.3725	1.87426	58.1825	1.92361	71.33	4.44828	143.123	1.16356
0.94	67.7125	2.45614	54.0175	1.9253	57.85	1.90104	70.44	4.30163	143.093	1.6424
1.01	67.3475	2.41036	53.845	1.94115	57.62	1.8896	70.12	4.26552	143.757	0.774797
1.08	67.04	2.42361	53.46	1.89945	57.3925	1.81389	69.51	4.20839	142.393	1.84788
1.15	66.575	2.39337	53.225	1.89254	57.125	1.79355	69.1433	4.22225	142.847	1.80272
1.22	66.075	2.225	53.1475	1.96395	56.72	1.78866	68.7567	4.38499	142.74	1.52923
1.3	65.6825	2.19095	53.02	1.9994	56.495	1.74507	68.3867	4.33833	143.537	0.936471
1.37	65.4125	2.17898	52.8175	2.01727	56.3125	1.70265	68.15	4.3834	143.14	1.19976
1.44	65.17	2.23598	52.6775	2.09942	56.03	1.6539	67.9	4.43098	142.813	1.51338
1.51	64.9425	2.23589	52.415	2.06237	55.8175	1.64035	67.61	4.4657	142.63	1.53663
1.58	64.595	2.12565	52.125	2.02387	55.74	1.66906	67.34	4.47741	142.84	1.3299
1.66	64.4425	2.0614	51.9175	1.98224	55.4175	1.64608	67.1367	4.45276	143.317	0.933262
1.73	64.34	2.08076	51.6	1.96589	55.3975	1.63771	66.8033	4.49063	142.947	1.32291
1.8	64.125	1.99007	51.35	1.92293	55.3125	1.57078	66.7	4.43942	143.03	1.39687
1.87	63.8325	1.83319	51.1925	1.93598	55.08	1.58746	66.5	4.4798	142.55	1.58035
1.94	63.66	1.88402	51.105	1.94068	54.96	1.54449	66.2	4.62241	143.127	1.15883
2.02	63.4475	1.83119	50.9525	1.96965	54.7775	1.50481	65.84	4.72051	143.047	1.26652
2.09	63.32	1.91588	50.83	1.9575	54.6675	1.52703	65.6067	4.74353	143.117	1.22961
2.16	63.2675	1.9534	50.615	1.98468	54.415	1.45394	65.49	4.68859	142.813	1.41283
2.23	63.205	1.947	50.5375	2.0022	54.3075	1.44055	65.2167	4.63092	142.733	1.4353
2.3	63.095	1.94256	50.3725	1.98047	54.175	1.42371	65.1367	4.59181	143.197	1.20495
2.38	62.95	1.95015	50.32	2.02178	53.9775	1.39863	64.9233	4.59525	142.907	1.26905
2.45	62.755	1.88818	50.28	1.9957	53.8125	1.30369	64.95	4.6229	142.847	1.30336
2.52	62.62	1.85141	50.145	1.95224	53.7925	1.32523	64.86	4.60163	142.763	1.3857
2.59	62.59	1.84784	49.8325	1.84583	53.67	1.30164	64.7833	4.56205	143.047	1.23079
2.66	62.4	1.90932	49.5825	1.73627	53.5275	1.27688	64.7467	4.6166	142.99	1.26097
2.74	62.2575	1.92486	49.375	1.69712	53.4975	1.2735	64.6367	4.54557	142.88	1.20567
2.81	62.2275	1.89671	49.165	1.64313	53.3725	1.25142	64.5533	4.54302	142.773	1.33417
2.88	62.0725	1.89093	48.0875	2.25855	53.1975	1.2196	64.52	4.54817	142.863	1.28572
2.95	62.01	1.87194	48.79	1.51246	53.02	1.21139	64.4067	4.53097	142.913	1.28468
3.02	61.88	1.87838	48.6775	1.49812	52.985	1.21407	64.1867	4.64833	142.997	1.20185
3.1	61.725	1.86788	48.62	1.5189	52.895	1.21281	63.91	4.70188	142.883	1.24035
3.17	61.6975	1.92354	48.5	1.53643	52.7575	1.17701	63.7733	4.71836	142.857	1.32268
3.24	61.545	1.90098	48.4	1.54537	52.725	1.1946	63.6267	4.72201	142.947	1.31322
3.31	61.5325	1.85846	48.4175	1.57635	52.61	1.20356	63.43	4.66049	143.037	1.28791
3.38	61.39	1.90377	48.2925	1.53156	52.5475	1.22307	63.2533	4.65227	143.067	1.26244
3.46	61.375	1.92343	48.12	1.58858	52.4975	1.19418	63.2267	4.62165	142.883	1.29309
3.53	61.285	1.87703	48.11	1.58187	52.4825	1.22707	63.1467	4.54718	142.983	1.32255
3.6	61.16	1.88199	48.0675	1.57343	52.4325	1.18263	63.1367	4.58833	142.9	1.29326
3.67	61.075	1.83733	47.9375	1.63996	52.2975	1.19777	63.0333	4.5562	142.97	1.22202
3.74	60.9825	1.80297	47.815	1.65806	52.15	1.20959	62.9633	4.60301	142.93	1.30067
3.82	60.865	1.76982	47.8025	1.66314	52.1875	1.16368	62.9	4.51866	142.91	1.29585
3.89	60.6975	1.77231	47.72	1.64153	51.97	1.18459	62.7433	4.54115	142.927	1.3412
3.96	60.5625	1.77125	47.615	1.68195	52.01	1.16845	62.69	4.45956	142.92	1.26083
4.03	60.4375	1.76945	47.5125	1.66113	51.9325	1.21309	62.5733	4.52035	142.943	1.27138
4.1	60.2175	1.79047	47.4775	1.68851	51.895	1.18505	62.4	4.45094	142.94	1.30296
4.18	60.08	1.75227	47.41	1.654	51.8675	1.18815	62.3667	4.44442	142.867	1.25215
4.25	60.0175	1.76846	47.3625	1.65932	51.7325	1.16939	62.3133	4.35786	142.99	1.29317
4.32	59.92	1.78844	47.3075	1.69761	51.7425	1.19329	62.2767	4.42519	142.92	1.28103
4.39	59.96	1.79712	47.2775	1.68166	51.6875	1.20138	62.2867	4.37712	142.937	1.29949
4.46	59.835	1.74889	47.1025	1.66641	51.6275	1.19853	62.13	4.33399	142.947	1.24606
4.54	59.7075	1.76557	46.9675	1.65834	51.5325	1.16534	62.0033	4.30612	142.91	1.27988
4.61	59.62	1.77161	46.905	1.6309	51.5425	1.19987	62.05	4.28838	142.867	1.26349
4.68	59.575	1.819	46.8325	1.59689	51.465	1.17022	61.87	4.25114	142.95	1.30715
4.75	59.5225	1.84396	46.7675	1.56803	51.44	1.15062	61.8833	4.21862	142.897	1.22857
4.82	59.4425	1.81158	46.73	1.60581	51.35	1.14319	61.7333	4.13534	142.883	1.20457
4.9	59.4175	1.85006	46.725	1.62652	51.285	1.15937	61.6933	4.16833	142.937	1.22455
4.97	59.3425	1.86147	46.655	1.60718	51.2375	1.17129	61.49	4.13246	142.903	1.24978
5.04	59.2375	1.87978	46.6025	1.61548	51.1375	1.16643	61.2367	3.99205	142.933	1.29843
5.11	59.1575	1.88486	46.5525	1.62145	51.0275	1.22019	61.0567	3.9101	142.957	1.27668
5.18	59.0725	1.88895	46.48	1.6505	50.92	1.24949	60.79	3.78984	142.867	1.2406
5.26	58.9975	1.82171	46.46	1.66128	50.8225	1.26622	60.6967	3.74438	142.85	1.24069
5.33	58.8825	1.79341	46.365	1.65352	50.725	1.28692	60.55	3.72296	142.873	1.29185
5.4	58.8275	1.7928	46.335	1.68314	50.6775	1.30462	60.4833	3.61274	142.917	1.25847
5.47	58.775	1.79741	46.3225	1.67938	50.565	1.31883	60.3833	3.62615	142.937	1.32793
5.54	58.7975	1.85614	46.22	1.70507	50.425	1.3195	60.2633	3.67783	142.903	1.24494
5.62	58.61	1.83265	46.205	1.71011	50.3225	1.31483	60.1467	3.66874	142.963	1.26899
5.69	58.4975	1.81866	46.1125	1.69147	50.2725	1.34267	60.05	3.71291	142.977	1.26387
5.76	58.51	1.86945	46.105	1.69726	50.1525	1.34059	59.8633	3.70276	142.937	1.26203
5.83	58.4575	1.85311	46.1225	1.71242	49.965	1.33812	59.7967	3.71156	142.963	1.29751
5.9	58.345	1.88505	46.0325	1.74522	49.8625	1.37782	59.64	3.72705	142.88	1.25914
5.98	58.2575	1.87022	45.92	1.71399	49.795	1.32331	59.5733	3.69565	142.863	1.24727
6.05	58.245	1.88866	46.015	1.73151	49.745	1.27649	59.47	3.67525	142.94	1.29325
6.12	58.15	1.91441	45.9125	1.75282	49.6175	1.31986	59.4	3.64427	142.933	1.27112
6.19	58.0975	1.89782	45.92	1.76388	49.48	1.31166	59.31	3.63864	142.957	1.23965
6.26	58	1.9243	45.835	1.73807	49.43	1.36602	59.1467	3.62984	142.96	1.25914
6.34	57.9475	1.9198	45.64	1.79748	49.3425	1.35125	59.25	3.60759	142.97	1.3095
6.41	57.9575	1.93498	45.555	1.82867	49.155	1.40806	59.1033	3.60491	142.923	1.28585
6.48	57.8175	1.87768	45.475	1.82998	49.09	1.40547	59.09	3.67998	142.953	1.25375
6.55	57.7575	1.90355	45.355	1.85176	48.98	1.35343	59.0167	3.62286	142.92	1.24649
6.62	57.725	1.91097	45.37	1.8945	48.8925	1.3975	58.9733	3.62903	142.917	1.28013
6.7	57.6	1.90411	45.34	1.84322	48.8275	1.36698	58.84	3.57086	142.96	1.29423
6.77	57.4975	1.91202	45.2575	1.86726	48.7725	1.38409	58.7033	3.50174	142.917	1.26568
6.84	57.4225	1.95485	45.2675	1.8729	48.705	1.33599	58.6567	3.46047	142.927	1.29304
6.91	57.335	1.94326	45.2225	1.89182	48.5925	1.3287	58.5633	3.48685	142.91	1.27996
6.98	57.27	1.90984	45.1575	1.9271	48.6325	1.31932	58.5133	3.47878	142.86	1.25044
7.05	57.29	1.95091	45.07	1.89585	48.5225	1.35119	58.4367	3.40444	142.933	1.26354
7.13	57.165	1.93822	45.0425	1.90053	48.435	1.3343	58.3667	3.33277	142.917	1.28991
7.2	57.125	1.94512	45.135	1.90493	48.4575	1.28831	58.23	3.27147	142.91	1.28099
7.27	56.9275	1.95205	45.0125	1.93643	48.3725	1.32219	58.1067	3.30748	142.843	1.2646
7.34	56.9475	1.99973	44.9575	1.92721	48.3225	1.31005	58.0367	3.22969	142.887	1.257
7.42	56.8975	1.9758	45.005	1.93656	48.3325	1.29468	58.0233	3.17134	142.233	1.71228
7.49	56.8425	1.98779	45.0075	1.93063	48.1725	1.28613	57.8967	3.15376	142.863	1.29411
7.56	56.755	2.01533	44.9675	1.97581	48.2725	1.28242	57.7833	3.08915	142.93	1.32349
7.63	56.685	2.03752	44.9175	1.98502	48.175	1.31865	57.7	3.11821	142.94	1.321
7.7	56.67	1.98624	44.88	1.9452	48.0725	1.29486	57.5867	3.0415	142.917	1.32353
7.77	56.635	2.02103	44.915	1.94498	47.9875	1.28092	57.46	3.07562	142.877	1.27281
7.85	56.5675	2.00519	44.795	1.96301	47.9375	1.28726	57.4067	3.09422	142.993	1.3198
7.92	56.525	1.99431	44.7175	1.97217	47.7267	1.4872	57.26	3.09387	142.9	1.32378
7.99	56.515	2.05954	44.715	1.99233	47.6767	1.52322	57.1933	3.14497	142.92	1.32455
8.06	55.73	2.3276	44.6025	1.97353	47.6733	1.54536	57.1467	3.10211	143.01	1.32685
8.13	55.64	2.30641	44.5625	1.97905	47.5567	1.53455	57.09	3.05791	142.87	1.31761
8.21	55.67	2.33896	44.58	2.00709	47.6067	1.4932	57.03	3.11246	142.88	1.28535
8.28	55.6	2.26934	44.5025	2.00048	47.5767	1.50098	56.9933	3.06617	142.95	1.28969
8.35	55.5	2.31871	44.455	1.99059	47.4567	1.4872	59.44	2.45765	142.913	1.30453
8.42	55.58	2.28772	44.495	2.00505	46.8067	1.38847	59.225	2.4699	142.993	1.27567
8.49	55.39	2.30528	44.445	1.99529	47.4067	1.47347	59.15	2.42499	142.937	1.25367
8.57	55.3933	2.27066	44.3525	2.01772	47.3333	1.49514	58.99	2.39233	142.913	1.28639
8.64	55.4333	2.27066	44.38	2.01434	47.3333	1.45198	58.95	2.42499	142.947	1.25887
8.71	55.3167	2.28796	44.315	2.01948	47.2467	1.45507	58.88	2.39233	142.8	1.24712
8.78	55.3433	2.31562	44.2675	2.06824	47.2833	1.46373	58.73	2.40866	142.93	1.27996
8.85	55.2633	2.27973	44.2125	2.05676	47.16	1.44569	58.79	2.34335	142.953	1.29038
8.93	55.2767	2.30348	44.1125	2.03216	47.12	1.38676	58.54	2.39233	142.877	1.28136
9	55.2367	2.2566	44.1475	2.02298			58.425	2.24945	142.883	1.23964
9.07	55.22	2.29316	44.085	2.01348			58.35	2.31885	142.857	1.3008
9.14	55.15	2.30197	44.105	2.06298			58.3	2.2372	142.87	1.25588
9.21	55.02	2.36536	44.5767	2.43623					142.88	1.26028
9.29	54.9567	2.33595	44.4867	2.46378					142.883	1.2671
9.36	54.9667	2.38846	44.54	2.44624					142.873	1.25039
9.43	57.11	2.00818							142.897	1.24277
9.5	57.075	1.95515							142.843	1.28214
9.57									142.88	1.25636
									142.87	1.20785
									142.883	1.26788
