# Supplementary material for: How tank-mix adjuvant type and concentration influence the contact angle on wheat leaf surface
Source: PeerJ. 2023 Nov 21;11:e16464. doi: 10.7717/peerj.16464 (PMC10668805; doi:10.7717/peerj.16464)
Supplement: Supplemental Information 9 [file peerj-11-16464-s009.xlsx]

## Sheet: 4%-16%mean
	0.04		0.08		0.12		0.16		Tap-water
Time [s]	Mean	SE	Mean	SE	Mean	SE	Mean	SE
0	67.13	1.58371	70.21	9.31014	65.81	4.15952	67.63	2.47812	144.33	0.7292
0.07	67.13	1.58371	66.3267	5.94999	70.0667	13.6597	65.5033	3.25073	139.732	5.3717
0.14	75.1633	5.43169	71.4467	9.42718	69.9233	2.90207	60.0733	1.79885	144.083	1.04667
0.22	73.59	4.98898	71.9033	9.22837	70.6233	5.15116	60.4967	3.25382	146.54	2.19475
0.29	71.6	4.05749	70.0767	8.07267	70.1167	5.27341	57.6367	3.81035	142.197	0.857561
0.36	72.4267	3.75392	70.3567	8.58586	68.3767	4.89991	55.9067	4.25226	143.677	1.76923
0.43	72.55	3.90535	70.5633	9.04758	68.7567	6.01939	54.4367	4.7517	140.073	3.03276
0.5	72.24	3.75527	69.95	8.72565	67.4467	5.82725	53.5567	5.16943	143.297	0.85795
0.58	72.1733	3.74251	69.5667	8.57181	67.3233	6.28013	52.7933	5.00069	139.4	3.0862
0.65	72.23	3.77776	69.42	8.74727	67.0267	6.35378	52.1967	4.92134	143.467	1.03565
0.72	72.03	3.93097	69.27	8.76812	66.1	6.79326	51.3333	4.91864	142.663	1.54952
0.79	71.8667	4.01772	69.2133	8.76145	65.84	7.12659	50.8033	4.94426	141.823	2.37327
0.86	71.8833	3.9617	69.1167	8.76002	65.58	7.15464	50.38	4.93187	143.123	1.16356
0.94	71.8667	4.0135	69.0667	8.75971	65.2933	7.17074	50.1033	4.98854	143.093	1.6424
1.01	71.6367	4.02848	69.0467	8.76124	65.26	7.33145	49.85	5.12623	143.757	0.774797
1.08	71.6533	4.01091	68.93	8.68539	65.0767	7.33868	49.53	5.09264	142.393	1.84788
1.15	71.4667	4.00737	68.8333	8.61289	64.9133	7.34062	49.2233	5.07322	142.847	1.80272
1.22	71.4033	3.98905	68.8433	8.64815	64.58	7.43811	49.0233	5.06322	142.74	1.52923
1.3	71.2667	4.03881	68.77	8.60544	64.3867	7.45808	48.8167	5.15227	143.537	0.936471
1.37	71.09	4.0917	66.9167	6.79256	64.2833	7.48016	48.6933	5.18884	143.14	1.19976
1.44	70.9267	4.07288	66.66	6.81858	64.64	7.79531	48.53	5.158	142.813	1.51338
1.51	70.7667	4.03904	68.11	8.351	64.1167	7.50733	48.3033	5.16656	142.63	1.53663
1.58	70.7433	4.06262	67.8667	8.32666	63.9433	7.50763	47.83	4.6547	142.84	1.3299
1.66	70.7333	4.04625	67.7567	8.37023	63.8333	7.55778	46.8167	4.02134	143.317	0.933262
1.73	70.58	4.09904	67.7	8.35917	63.6833	7.61098	46.4967	3.84582	142.947	1.32291
1.8	70.57	4.10004	67.6	8.39277	63.3933	7.65403	46.36	3.80626	143.03	1.39687
1.87	70.5533	4.04141	67.4867	8.41632	63.2367	7.55894	46.2967	3.70679	142.55	1.58035
1.94	70.4567	4.09326	67.5067	8.33701	63.11	7.57875	46.4767	3.44491	143.127	1.15883
2.02	70.38	4.09863	67.44	8.43849	62.9833	7.5734	46.4967	3.408	143.047	1.26652
2.09	70.3233	4.06509	67.4	8.43993	62.97	7.53035	46.4567	3.31353	143.117	1.22961
2.16	70.2433	4.10863	67.34	8.40718	62.82	7.48656	46.4367	3.31728	142.813	1.41283
2.23	70.18	4.07792	65.8533	7.01593	62.7967	7.47534	46.3933	3.29012	142.733	1.4353
2.3	70.1	4.05332	67.18	8.41146	62.75	7.47936	46.4267	3.32169	143.197	1.20495
2.38	70.09	4.08367	67.0733	8.41112	62.6933	7.48369	46.3333	3.29211	142.907	1.26905
2.45	70.0067	4.07355	66.9333	8.30691	62.6733	7.43321	46.3233	3.25577	142.847	1.30336
2.52	69.97	4.05083	66.66	8.13497	62.6033	7.45838	46.2233	3.19317	142.763	1.3857
2.59	69.9033	4.03475	66.34	7.96255	62.5767	7.47273	46.1533	3.18193	143.047	1.23079
2.66	69.63	4.11245	66.2967	7.9493	62.5033	7.4562	46.01	3.11604	142.99	1.26097
2.74	69.4333	4.13389	66.17	7.86781	62.3467	7.24924	45.8933	3.11607	142.88	1.20567
2.81	69.3867	4.17188	64.9867	6.80118	62.31	7.2957	45.6667	2.94133	142.773	1.33417
2.88	69.2033	4.2706	65.98	7.79425	62.19	7.28602	45.4667	2.86851	142.863	1.28572
2.95	69.1833	4.23274	65.9033	7.82901	62.0533	7.1526	45.23	2.70001	142.913	1.28468
3.02	68.98	4.28019	65.81	7.84133	61.8867	7.0388	45.2	2.71663	142.997	1.20185
3.1	68.9767	4.31804	65.7733	7.89513	61.7367	7.03305	45.0233	2.80539	142.883	1.24035
3.17	68.8933	4.32743	65.7	7.9574	61.6867	7.01193	44.9867	2.74553	142.857	1.32268
3.24	68.8733	4.31013	65.6033	7.94563	61.6467	6.97126	44.9867	2.74115	142.947	1.31322
3.31	68.8133	4.33996	65.5233	7.98188	61.5033	6.99828	44.9233	2.72739	143.037	1.28791
3.38	68.75	4.30591	65.4467	8.02511	61.4933	6.98987	44.81	2.66613	143.067	1.26244
3.46	68.64	4.34135	65.34	8.07517	61.38	6.98016	44.79	2.65801	142.883	1.29309
3.53	68.5667	4.38418	65.31	8.11281	61.37	6.97783	44.7533	2.65512	142.983	1.32255
3.6	68.52	4.36581	65.1667	8.08175	61.26	7.02242	44.64	2.64697	142.9	1.29326
3.67	68.4567	4.3746	65.2267	8.12081	61.2567	7.01408	44.6167	2.6751	142.97	1.22202
3.74	68.41	4.35556	65.1067	8.13225	61.2133	6.98614	44.5667	2.63913	142.93	1.30067
3.82	68.3567	4.36595	65.15	8.15755	61.21	7.03963	44.4967	2.67697	142.91	1.29585
3.89	68.32	4.36258	65.07	8.18366	61.1533	6.95663	44.4467	2.62435	142.927	1.3412
3.96	68.21	4.37981	65.0867	8.18093	61.0767	6.95908	44.3667	2.6348	142.92	1.26083
4.03	68.1633	4.34938	65.0167	8.15329	60.98	6.95273	44.23	2.61134	142.943	1.27138
4.1	68.1267	4.33961	65.0167	8.17052	60.98	6.95621	44.16	2.65915	142.94	1.30296
4.18	68.0433	4.37712	64.99	8.19806	60.93	6.97368	44.15	2.61582	142.867	1.25215
4.25	68.0133	4.36562	64.9133	8.24856	60.8933	6.94618	44.0867	2.63888	142.99	1.29317
4.32	67.9267	4.37608	64.93	8.20451	60.8067	6.93963	44.0267	2.583	142.92	1.28103
4.39	67.1567	4.4047	64.9267	8.19717	60.8467	6.96659	44.0367	2.50087	142.937	1.29949
4.46	67.7833	4.34027	64.87	8.23785	60.8733	6.91423	43.84	2.5243	142.947	1.24606
4.54	67.78	4.38426	64.8767	8.23076	60.76	6.92475	43.86	2.51913	142.91	1.27988
4.61	67.72	4.36054	64.85	8.22391	60.6633	6.93575	43.8233	2.43507	142.867	1.26349
4.68	67.72	4.33519	64.7567	8.27085	60.64	6.92087	43.78	2.47243	142.95	1.30715
4.75	67.64	4.3031	64.7367	8.20639	60.5933	6.92326	43.6767	2.46212	142.897	1.22857
4.82	67.6233	4.35128	64.7367	8.1976	60.5133	6.9071	43.6133	2.43875	142.883	1.20457
4.9	66.45	3.53068	64.67	8.1921	60.5	6.91469	43.47	2.40508	142.937	1.22455
4.97	67.5033	4.29511	64.6	8.16699	60.4333	6.9691	43.3867	2.41993	142.903	1.24978
5.04	67.43	4.31771	64.5533	8.13554	60.3933	6.91057	43.46	2.42224	142.933	1.29843
5.11	67.3933	4.36973	63.4433	7.01036	60.2367	6.945	43.46	2.37643	142.957	1.27668
5.18	67.3767	4.30696	64.4867	8.16161	60.2333	6.80773	43.36	2.41961	142.867	1.2406
5.26	67.3933	4.32149	64.5167	8.13211	60.0733	6.74952	43.2767	2.437	142.85	1.24069
5.33	67.32	4.32454	64.54	8.16281	60.1167	6.95036	43.28	2.37732	142.873	1.29185
5.4	67.27	4.34286	64.51	8.19527	60.15	6.93012	43.2633	2.38449	142.917	1.25847
5.47	67.2733	4.3375	64.4433	8.21399	60.12	6.95286	43.2533	2.42779	142.937	1.32793
5.54	67.15	4.29708	64.45	8.22582	60.1367	6.92391	43.13	2.36425	142.903	1.24494
5.62	67.13	4.33028	64.44	8.25446	60.11	6.90287	43.1933	2.37292	142.963	1.26899
5.69	67.1533	4.31686	64.4333	8.23937	60.13	6.93223	43.1133	2.39328	142.977	1.26387
5.76	67.1267	4.30821	64.3767	8.24574	60.1033	6.95134	43.0967	2.37005	142.937	1.26203
5.83	67.07	4.28447	64.3333	8.2733	59.9933	6.93572	42.9967	2.42488	142.963	1.29751
5.9	67.0567	4.29836	64.3367	8.25326	60.07	6.91299	42.9533	2.40761	142.88	1.25914
5.98	66.96	4.27874	64.28	8.19263	60.02	6.95857	42.92	2.45392	142.863	1.24727
6.05	66.9167	4.25569	64.28	8.16825	59.9867	6.94104	42.87	2.44252	142.94	1.29325
6.12	66.8767	4.32477	64.2	8.14962	59.98	6.92425	42.8133	2.41628	142.933	1.27112
6.19	66.8267	4.2431	64.2667	8.22431	59.9667	6.9813	42.4667	2.0687	142.957	1.23965
6.26	66.7633	4.26334	64.1867	8.18024	59.98	6.90948	41.9767	1.75272	142.96	1.25914
6.34	66.77	4.24	64.2433	8.16299	59.94	6.9396	41.8	1.59954	142.97	1.3095
6.41	66.7033	4.22202	64.21	8.1465	59.9533	6.94053	41.5633	1.48212	142.923	1.28585
6.48	66.7067	4.23815	64.1267	8.12589	59.9733	6.9385	41.4733	1.52298	142.953	1.25375
6.55	66.6233	4.19905	64.1633	8.19252	59.9433	6.96225	41.5	1.48769	142.92	1.24649
6.62	66.5967	4.1967	64.1033	8.11234	59.8833	6.97135	41.3933	1.52799	142.917	1.28013
6.7	66.6533	4.17696	62.8733	6.9938	59.8767	6.94096	41.3933	1.44181	142.96	1.29423
6.77	66.6367	4.17386	64.08	8.08204	59.9067	6.95638	41.3033	1.43668	142.917	1.26568
6.84	66.5867	4.18111	64.0967	8.1135	59.9367	6.90862	41.2267	1.47362	142.927	1.29304
6.91	66.5367	4.18073	64.01	8.10923	59.3533	6.62418	41.2133	1.42233	142.91	1.27996
6.98	66.47	4.16181	63.9967	8.14762	59.7967	6.97851	41.18	1.37689	142.86	1.25044
7.06	66.3933	4.15119	63.89	8.08065	59.7867	6.94642	41.1667	1.40504	142.933	1.26354
7.13	66.4767	4.17746	63.96	8.0828	59.7033	6.9514	41.1033	1.47888	142.917	1.28991
7.2	66.3667	4.22526	63.9233	8.06669	59.64	6.94137	41.0767	1.45227	142.91	1.28099
7.27	66.36	4.19088	63.8267	8.04046	59.4367	7.03736	41.0633	1.44926	142.843	1.2646
7.34	66.3167	4.17881	63.8333	8.04521	59.4467	7.04417	41.0367	1.44528	142.887	1.257
7.41	66.2933	4.21191	63.8367	8.06788	59.3833	7.03125	41.0033	1.46037	142.233	1.71228
7.49	66.1933	4.17511	63.76	8.02302	59.2767	7.0251	40.8967	1.44117	142.863	1.29411
7.56	64.4833	3.02336	63.8233	8.02735	59.3633	7.04393	40.9133	1.45383	142.93	1.32349
7.63	66.19	4.21298	63.7967	8.05552	59.3267	7.0828	40.8867	1.36295	142.94	1.321
7.7	66.11	4.17316	63.7433	8.03052	59.3	7.08884	40.8633	1.40585	142.917	1.32353
7.77	66.1067	4.17958	63.71	8.06551	59.1233	7.07175	40.8233	1.36712	142.877	1.27281
7.85	66.07	4.17652	63.6833	8.0644	59.1467	7.11927	40.7833	1.35953	142.993	1.3198
7.92	65.9967	4.16695	63.6867	8.08828	59.06	7.09142	40.7633	1.34469	142.9	1.32378
7.99	65.97	4.14336	63.6833	8.05231	59.02	7.08029	40.7	1.38897	142.92	1.32455
8.06	65.9433	4.14197	63.6667	8.04245	58.97	7.04506	40.7333	1.36509	143.01	1.32685
8.13	65.9767	4.13318	63.61	8.06975	58.8533	7.05699	40.75	1.35244	142.87	1.31761
8.21	65.9367	4.07864	63.6233	8.06669	58.8033	7.06383	40.7233	1.33781	142.88	1.28535
8.28	65.8067	4.11189	63.5733	8.06125	58.7	7.00516	40.6833	1.31068	142.95	1.28969
8.35	65.8633	4.10829	63.5633	8.04702	58.77	7.00105	40.7233	1.25509	142.913	1.30453
8.42	65.7533	4.03257	62.04	6.61718	58.62	6.96797	40.5267	1.3748	142.993	1.27567
8.49	65.7567	4.00413	63.5733	8.08301	58.56	7.04819	40.5633	1.4086	142.937	1.25367
8.57	65.7167	3.99041	63.5867	8.08825	58.4967	6.98595	40.5667	1.26902	142.913	1.28639
8.64	65.6567	4.00522	63.5	8.04353	58.44	6.95296	40.4967	1.33796	142.947	1.25887
8.71	65.6367	3.99164	62.1833	6.76009	58.4467	6.96573	40.5433	1.28261	142.8	1.24712
8.78	65.64	3.94274	61.9867	6.62074	58.34	6.97572	40.49	1.29317	142.93	1.27996
8.85	65.5667	3.90747	63.5233	8.10465	58.2867	6.96789	40.43	1.30664	142.953	1.29038
8.93	65.6	3.96159	63.4833	8.10789	58.3267	7.02277	40.4367	1.29215	142.877	1.28136
9	65.5667	3.90796	63.52	8.08288	58.4567	6.99695	40.4567	1.29462	142.883	1.23964
9.07	65.5267	3.90885	63.4733	8.12538	58.2867	7.01653	40.3633	1.35649	142.857	1.3008
9.14	65.53	3.93299	63.48	8.09155	58.26	6.99476	40.4133	1.28442	142.87	1.25588
9.21	65.4533	3.87691	63.4767	8.12425	58.33	7.02517	40.4567	1.21029	142.88	1.26028
9.29	62.425	3.39254	63.4133	8.09596			40.4267	1.2428	142.883	1.2671
9.36	62.375	3.39254	63.3133	8.05463			40.4133	1.34495	142.873	1.25039
9.43	62.37	3.3558	63.35	8.07758			40.35	1.34878	142.897	1.24277
9.5	62.44	3.41296	63.3767	8.04262			40.31	1.30067	142.843	1.28214
9.57	62.32	3.41296	63.3467	8.08279			40.3067	1.26505	142.88	1.25636
9.65	62.395	3.35988	63.3667	8.08411			40.27	1.30664	142.87	1.20785
9.72	66.6								142.883	1.26788
