# Supplementary material for: How tank-mix adjuvant type and concentration influence the contact angle on wheat leaf surface
Source: PeerJ. 2023 Nov 21;11:e16464. doi: 10.7717/peerj.16464 (PMC10668805; doi:10.7717/peerj.16464)
Supplement: Supplemental Information 11 [file peerj-11-16464-s011.xlsx]

## Sheet: 0.2‰-0.8‰mean
	0.2‰		0.4‰		0.6‰		0.8‰		Tap-water
Time [s]	Mean	SE	Mean	SE	mean	SE	Mean	SE
0	77.7733	2.97095	79.1567	8.39541	53.76	1.77128	61.1867	6.6333	144.33	0.7292
0.07	74.1433	1.86172	75.44	11.1138	53.6933	1.9797	60.1433	4.9891	139.732	5.3717
0.14	73.3067	1.6061	74.25	11.7645	49.6267	1.68259	56.4767	5.10973	144.083	1.04667
0.22	72.1367	2.63764	71.2067	11.5745	46.84	1.64994	53.1433	5.22037	146.54	2.19475
0.29	71.5433	4.28348	68.6567	11.6068	44.49	1.60365	50.1633	5.46325	142.197	0.857561
0.36	70.14	4.93963	66.8333	11.5478	42.55	1.14936	47.5267	5.58413	143.677	1.76923
0.43	68.5067	4.58482	65.6933	11.2041	41.3333	0.956423	45.2533	5.30041	140.073	3.03276
0.5	66.82	4.86903	64.32	11.1576	39.84	0.996209	43.2533	5.36291	143.297	0.85795
0.58	66.2767	4.85153	62.7867	11.6875	38.3633	0.849752	41.5633	5.35738	139.4	3.0862
0.65	65.4167	5.22614	61.6133	11.5513	37.2833	1.07804	40.3567	5.22879	143.467	1.03565
0.72	64.3433	5.45471	60.71	11.4297	36.2467	0.837145	39.0067	4.99827	142.663	1.54952
0.79	63.2333	5.63105	59.4867	11.5217	34.85	0.879451	37.86	4.86155	141.823	2.37327
0.86	62.1667	5.97368	58.47	11.443	33.79	0.780342	36.9167	4.69176	143.123	1.16356
0.94	61.1467	6.12998	57.3667	11.3973	33.0367	0.959728	35.8067	4.3342	143.093	1.6424
1.01	60.2033	6.12909	56.4467	11.4557	32.8	0.715914	34.7533	4.14491	143.757	0.774797
1.08	59.3167	5.90907	55.5	11.3522	31.9	0.624206	33.8233	3.868	142.393	1.84788
1.15	58.6933	5.81979	54.7433	11.1676	31.3167	0.709327	32.7033	3.7745	142.847	1.80272
1.22	58.0433	5.58295	54.17	10.9231	30.65	0.566157	31.7633	3.68269	142.74	1.52923
1.3	57.66	5.52929	53.16	10.8325	30.0767	0.609927	30.8667	3.70208	143.537	0.936471
1.37	57.12	5.49846	52.38	10.8004	29.6233	0.598034	30.1167	3.64664	143.14	1.19976
1.44	56.6767	5.48969	51.71	10.6133	29.11	0.725075	29.2	3.54918	142.813	1.51338
1.51	56.34	5.26177	50.83	10.4243	28.77	0.761774	28.47	3.49663	142.63	1.53663
1.58	55.9667	5.24772	50.2567	10.0899	28.22	0.788606	27.5967	3.44067	142.84	1.3299
1.66	55.2867	5.11067	50.0567	9.76128	27.8133	0.872092	26.9	3.27813	143.317	0.933262
1.73	54.6767	5.09589	49.9033	9.36419	27.22	0.977053	26.53	3.11834	142.947	1.32291
1.8	54.01	5.17786	49.5967	9.0017	27	1.01908	25.77	2.97552	143.03	1.39687
1.87	53.6533	5.04036	48.6933	9.34814	26.78	1.035	25.0233	2.92697	142.55	1.58035
1.94	52.88	5.14655	48.8667	8.79433	26.3233	1.06498	24.4633	2.73243	143.127	1.15883
2.02	52.4333	5.10823	48.35	8.57928	25.8867	0.948004	24.15	2.56391	143.047	1.26652
2.09	52.0067	5.12589	47.9767	8.436	25.8633	0.887343	23.82	2.50943	143.117	1.22961
2.16	51.86	5.02932	47.5467	8.27149	25.4867	0.936827	23.3433	2.32616	142.813	1.41283
2.23	51.4067	5.01069	47.1367	8.17125	25.2067	0.859464	22.8867	2.18574	142.733	1.4353
2.3	51.15	4.90005	46.8067	8.09698	24.86	0.900389	22.6233	2.08024	143.197	1.20495
2.38	50.8	4.8842	46.5133	8.04733	24.56	0.811316	22.32	1.95439	142.907	1.26905
2.45	50.4333	4.79626	46.01	7.98887	23.9467	0.678487	22.28	1.74451	142.847	1.30336
2.52	50.2033	4.78779	45.6367	7.71999	23.4567	0.661068	21.85	1.62094	142.763	1.3857
2.59	49.84	4.75499	45.2367	7.67964	22.88	0.678258	21.55	1.58298	143.047	1.23079
2.66	49.35	4.90491	44.8667	7.53493	22.7133	0.781245	21.16	1.46769	142.99	1.26097
2.74	49.0067	4.93025	41.53	7.98103	22.5167	0.667691	20.71	1.42243	142.88	1.20567
2.81	48.76	4.84373	44.1533	7.52758	22.34	0.716752	20.3933	1.41179	142.773	1.33417
2.88	48.23	4.75754	43.9133	7.37453	22.14	0.686756	20.2167	1.2426	142.863	1.28572
2.95	47.6433	4.83906	43.5367	7.23097	21.9967	0.671549	20.1733	1.24335	142.913	1.28468
3.02	47.2733	4.87835	43.1967	7.10892	21.8533	0.745572	19.7433	1.12223	142.997	1.20185
3.1	46.8733	4.75623	42.9233	6.91691	21.5567	0.693357	19.5067	1.01974	142.883	1.24035
3.17	46.43	4.84886	42.56	6.62369	21.46	0.843386	19.25	0.942974	142.857	1.32268
3.24	46.19	4.71521	42.1133	6.53213	21.22	0.843169	19.01	0.967178	142.947	1.31322
3.31	45.9067	4.69997	41.8333	6.47668	21.12	0.736569	18.77	0.960954	143.037	1.28791
3.38	45.5167	4.537	41.6533	6.32216	20.9833	0.704754	18.48	0.936002	143.067	1.26244
3.46	45.25	4.55233	41.4	6.26605	20.7767	0.67135	18.1167	0.831571	142.883	1.29309
3.53	44.67	4.40675	40.9833	6.16686	20.76	0.655057	17.9133	0.850516	142.983	1.32255
3.6	44.3767	4.27103	40.8467	6.04764	20.72	0.631744	17.6367	0.775657	142.9	1.29326
3.67	44.26	4.28234	40.5567	5.92284	20.6667	0.660816	17.3367	0.67964	142.97	1.22202
3.74	44.14	4.16328	40.3867	5.90554	20.5333	0.69439	16.9133	0.41898	142.93	1.30067
3.82	43.8967	4.14273	40.0233	5.89595	20.55	0.687386	16.61	0.300888	142.91	1.29585
3.89	43.5967	4.02683	39.76	5.65393	20.3967	0.693934	16.1433	0.203415	142.927	1.3412
3.96	43.55	4.01976	39.41	5.71635	20.2367	0.732492	16.1867	0.517215	142.92	1.26083
4.03	43.23	3.98147	39.1533	5.66917	20.2567	0.743535	16.0567	0.169542	142.943	1.27138
4.1	43.16	3.85863	38.97	5.3763	20.04	0.711899	15.4267	0.265602	142.94	1.30296
4.18	43.0333	3.95456	38.7467	5.30558	19.9967	0.68863	15.8167	0.0841295	142.867	1.25215
4.25	43.09	3.8856	38.41	5.24515	20.0133	0.699007	15.8333	0.337359	142.99	1.29317
4.32	42.7933	3.91324	38.3033	5.17122	19.9133	0.717503	15.6967	0.311573	142.92	1.28103
4.39	42.5767	3.8302	36.42	5.44295	19.82	0.753945	15.56	0.150997	142.937	1.29949
4.46	42.3233	3.81049	37.7333	5.03445	19.5367	0.674595	15.28	0.176918	142.947	1.24606
4.54	42.1333	3.79326	37.5233	4.89882	19.6667	0.766254	15.5067	0.48254	142.91	1.27988
4.61	41.82	3.79166	37.2667	4.81822	19.6333	0.787281	15.04	0.175024	142.867	1.26349
4.68	41.6767	3.82018	36.99	4.64429	19.3433	0.786857	14.9233	0.129786	142.95	1.30715
4.75	41.5833	3.85496	36.6633	4.62886	19.2367	0.68921	14.7833	0.211765	142.897	1.22857
4.82	41.39	3.7525	36.35	4.4944	19.2967	0.753864	14.6767	0.149034	142.883	1.20457
4.9	41.26	3.68077	36.1067	4.36999	19.0667	0.750252	14.5267	0.150591	142.937	1.22455
4.97	41.1833	3.60928	35.8867	4.31392	18.98	0.765136	14.41	0.105987	142.903	1.24978
5.04	41.02	3.54876	35.6	4.12957	18.86	0.688573	14.1	0.0550757	142.933	1.29843
5.11	40.7967	3.55817	35.39	4.06412	18.8867	0.726919	14.0367	0.105251	142.957	1.27668
5.18	40.6067	3.48293	35.0333	3.92043	18.75	0.773714	13.7967	0.230675	142.867	1.2406
5.26	40.4367	3.50815	34.7867	3.83738	18.5467	0.669859	13.9133	0.309049	142.85	1.24069
5.33	40.36	3.57439	34.5967	3.55934	18.5267	0.586411	13.53	0.3646	142.873	1.29185
5.4	40.1367	3.43623	34.37	3.55551	18.4767	0.597058	13.8	0.352326	142.917	1.25847
5.47	40.1333	3.42371	34.12	3.49293	18.2967	0.580928	13.4667	0.436743	142.937	1.32793
5.54	39.97	3.40319	33.9333	3.27101	18.4333	0.878281	13.4167	0.351773	142.903	1.24494
5.62	39.86	3.30854	33.6767	3.35957	18.0067	0.632622	13.33	0.381576	142.963	1.26899
5.69	39.7	3.32366	33.27	3.17887	17.9167	0.680106	12.8533	0.51969	142.977	1.26387
5.76	39.4467	3.41297	33.2567	3.08008	17.84	0.640937	12.99	0.471628	142.937	1.26203
5.83	38.85	3.41686	32.9733	2.9924	17.7167	0.737797	12.8933	0.523747	142.963	1.29751
5.9	38.7433	3.33967	32.77	2.99782	17.2867	0.432139	12.5533	0.505448	142.88	1.25914
5.98	38.5467	3.39314	32.5367	2.92167	17.1967	0.354087	12.1967	0.8154	142.863	1.24727
6.05	38.2567	3.27084	30.92	4.08842	16.9733	0.278468	11.93	0.681982	142.94	1.29325
6.12	38.0233	3.33121	32.11	2.89158	16.94	0.283608	11.6	0.728034	142.933	1.27112
6.19	37.84	3.2015	31.9367	2.85914	16.5867	0.241132	11.5567	0.820251	142.957	1.23965
6.26	37.7633	3.39918	30.25	4.02514	16.5567	0.203661	11.4733	0.779238	142.96	1.25914
6.34	37.52	3.30207	31.58	2.67272	16.4133	0.351679	11.28	1.06588	142.97	1.3095
6.41	37.3633	3.37684	29.7133	3.82264	16.3033	0.387054	11.09	0.935646	142.923	1.28585
6.48	37.3467	3.23375	31.0633	2.52154	16.3033	0.342653	10.9833	1.03512	142.953	1.25375
6.55	37.1933	3.25167	30.79	2.48311	15.8633	0.440845	10.99	0.975004	142.92	1.24649
6.62	36.9967	3.27193	30.7967	2.28325	15.7633	0.480081	11.0033	0.918719	142.917	1.28013
6.7	36.92	3.25718	30.6667	2.30754	15.8133	0.475582	10.6033	0.889369	142.96	1.29423
6.77	36.7767	3.27762	28.5867	3.72936	15.7667	0.534301	10.5367	0.800757	142.917	1.26568
6.84	36.5767	3.15638	30.2633	2.25915	15.57	0.400791	10.4467	0.717271	142.927	1.29304
6.91	36.39	3.15748	28.2433	3.71567	15.4767	0.465916	10.3067	0.813927	142.91	1.27996
6.98	36.3333	3.12843	27.9267	3.63363	15.4267	0.448714	10.19	0.645781	142.86	1.25044
7.06	36.25	2.97409	29.8033	2.17973	15.3467	0.490045	10.38	0.855005	142.933	1.26354
7.13	36.0633	3.02228	27.6033	3.5635	15.2433	0.397716	10.71	0.811316	142.917	1.28991
7.2	36.0067	3.07398	29.32	2.18502	15.2033	0.416827	10.7833	0.746934	142.91	1.28099
7.27	35.7933	3.05944	27.2667	3.45657	15.22	0.542433	10.56	0.792233	142.843	1.2646
7.34	35.6067	2.93186	27.05	3.53124	15.2467	0.534862	10.64	0.949965	142.887	1.257
7.42	35.4867	2.90187	26.8033	3.61761	15.2	0.56107	10.47	1.00421	142.233	1.71228
7.49	35.1133	3.01168	26.5667	3.57223	15.1367	0.668838	10.37	0.882289	142.863	1.29411
7.56	35.08	2.77426	28.6167	2.14248	15.0967	0.617909	10.2767	0.722549	142.93	1.32349
7.63	34.9767	2.81099	28.4933	2.02943	14.88	0.495412	10.05	0.527289	142.94	1.321
7.7	35.0033	2.7644	28.46	1.99926	14.87	0.649692	10.0033	0.580125	142.917	1.32353
7.77	34.5633	2.78399	28.1833	2.02213	14.7933	0.681819	10.0933	0.583733	142.877	1.27281
7.85	34.3933	2.80909	25.56	3.59501	14.6933	0.557146	10.08	0.710845	142.993	1.3198
7.92	34.2633	2.71267	27.82	1.95296	13.9667	1.05845	10.09	0.553384	142.9	1.32378
7.99	34.07	2.70386	27.5933	1.92036	16.74	1.78754	10	0.529937	142.92	1.32455
8.06	34.0267	2.65823	25.0067	3.62421	16.46	1.45258	10.0233	0.566902	143.01	1.32685
8.13	33.7867	2.70635	24.72	3.51938	16.2667	1.39167	9.93667	0.657934	142.87	1.31761
8.21	33.7167	2.67219	24.4567	3.53961	15.9967	1.20937	9.76333	0.523333	142.88	1.28535
8.28	33.4367	2.82218	26.3867	1.98674	14.71	0.1253	9.89333	0.746689	142.95	1.28969
8.35	33.1467	2.75296	26.3367	1.98214	14.73	0.0550757	9.84333	0.617774	142.913	1.30453
8.42	33.2633	2.78666	25.68	2.19679	14.64	0.324705	10.0167	0.582876	142.993	1.27567
8.49	33.1167	2.83725	23.8767	3.62102	13.67	1.06297	9.88	0.675599	142.937	1.25367
8.57	32.9767	2.69657	23.84	3.52083	13.5933	1.10849	9.77667	0.528089	142.913	1.28639
8.64	32.9567	2.7304	25.32	2.08847	14.1033	0.435137	9.77	0.725052	142.947	1.25887
8.71	32.6967	2.79192	23.5	3.42896	14.1233	0.373155	9.95667	0.761935	142.8	1.24712
8.78	32.8233	2.67697	23.7267	3.1379	13.3567	1.06383	9.5	0.540278	142.93	1.27996
8.85	32.62	2.6446	24.7133	2.04357	13.2333	1.08967	9.66	0.825853	142.953	1.29038
8.93	32.58	2.7579	24.7033	1.97248	13.95	0.370045	9.83	0.905226	142.877	1.28136
9	32.4967	2.52445	23.81	2.43575	13.93	0.355528	9.38333	0.738745	142.883	1.23964
9.07	32.5167	2.62164	23.7833	2.40982	13.9967	0.171691	9.31	0.995004	142.857	1.3008
9.14	32.3167	2.50018	24.2867	1.82597	14.1533	0.258285	9.64	1.00107	142.87	1.25588
9.21	32.4067	2.53962	23.4067	2.3159	12.7567	0.96361	9.23	0.80829	142.88	1.26028
9.29	32.31	2.48255	23.2733	2.26108	12.6433	0.926954	9.35667	0.971774	142.883	1.2671
									142.873	1.25039
									142.897	1.24277
									142.843	1.28214
									142.88	1.25636
									142.87	1.20785
									142.883	1.26788
