# Supplementary material for: How tank-mix adjuvant type and concentration influence the contact angle on wheat leaf surface
Source: PeerJ. 2023 Nov 21;11:e16464. doi: 10.7717/peerj.16464 (PMC10668805; doi:10.7717/peerj.16464)
Supplement: Supplemental Information 13 [file peerj-11-16464-s013.xlsx]

## Sheet: 0.1‰-0.3‰mean
	0.1‰		0.2‰		0.3‰		Tap-water
Time [s]	mean	SE	mean	SE	mean	SE
0	68.3167	4.92548	54.25	7.95682	57.5867	1.0815	144.33	0.7292
0.07	64.36	4.12167	52.7033	8.3051	52.8267	0.210739	139.732	5.3717
0.14	61.8633	3.98906	47.5	6.7212	46.3433	0.756755	144.083	1.04667
0.22	60.45	4.33311	44.5867	5.45193	42.7267	1.1444	146.54	2.19475
0.29	58.5267	4.26995	41.5833	5.6217	38.1567	0.744431	142.197	0.857561
0.36	57.69	4.28816	37.7233	4.99677	34.0067	0.804867	143.677	1.76923
0.43	56.1033	4.12014	35.11	4.84	31.4767	0.568546	140.073	3.03276
0.5	54.8767	3.31877	34.0367	4.07337	29.01	0.666658	143.297	0.85795
0.58	52.9033	3.35021	32.0967	3.576	26.77	0.86539	139.4	3.0862
0.65	52.01	3.52424	29.79	3.62048	24.63	0.752485	143.467	1.03565
0.72	51.19	3.18522	27.9467	2.95952	23.14	0.879337	142.663	1.54952
0.79	50.2533	3.25113	26.0767	2.38801	21.87	0.773908	141.823	2.37327
0.86	49.5067	3.06014	25.5367	1.91275	20.6533	0.903592	143.123	1.16356
0.94	48.94	2.97577	24.32	1.66421	19.56	0.968005	143.093	1.6424
1.01	48.0833	3.06067	23.4667	1.47739	18.39	0.860639	143.757	0.774797
1.08	47.3633	3.05628	23.2233	1.9127	17.7833	0.926685	142.393	1.84788
1.15	46.7767	3.16107	22.1867	1.74799	17.2067	0.775056	142.847	1.80272
1.22	46.1367	3.2245	21.5533	1.77918	16.6633	1.00393	142.74	1.52923
1.3	45.3967	3.21909	21.2067	1.52215	14.86	1.97773	143.537	0.936471
1.37	44.82	3.23992	20.2033	1.30642	13.36	2.47407	143.14	1.19976
1.44	43.94	3.26388	19.6533	0.80586	12.8067	2.5184	142.813	1.51338
1.51	43.01	3.29667	19.3333	1.32426	12.3067	2.41229	142.63	1.53663
1.58	42.44	3.23441	18.74	1.24	11.7633	2.50264	142.84	1.3299
1.66	41.7067	3.23551	17.84	1.71249	10.9467	2.21135	143.317	0.933262
1.73	41.09	3.27985	16.4133	1.22035	10.63	2.16207	142.947	1.32291
1.8	40.36	3.23209	16.25	0.916515	9.37667	2.73956	143.03	1.39687
1.87	39.63	3.30365	16.1533	1.22682	9.03667	2.8553	142.55	1.58035
1.94	38.9667	3.31302	15.2633	1.16041	8.73	2.79448	143.127	1.15883
2.02	38.2933	3.30099	15.1767	1.0681	8.42333	2.82025	143.047	1.26652
2.09	37.6367	3.47206	14.7833	1.05912	7.32667	2.75033	143.117	1.22961
2.16	36.8233	3.3757	14.6667	1.02803	7.43667	2.77865	142.813	1.41283
2.23	36.0533	3.19897	14.9267	1.61103	6.40333	2.91772	142.733	1.4353
2.3	35.51	2.95299	14.2467	1.63394	5.56667	2.46796	143.197	1.20495
2.38	34.8267	2.75363	13.7067	1.37353	6.15	2.8664	142.907	1.26905
2.45	34.3033	2.52741	13.2967	1.57677	5.58	2.41216	142.847	1.30336
2.52	33.36	2.42203	13.07	1.14605	4.82333	1.72619	142.763	1.3857
2.59	32.7033	2.16398	12.5733	1.22358	4.62333	1.88096	143.047	1.23079
2.66	32.2733	2.11599	11.59	0.600528			142.99	1.26097
2.74	31.8567	2.00089	11.6667	0.60372			142.88	1.20567
2.81	31.5167	1.97987	12.0033	1.37104			142.773	1.33417
2.88	30.7267	2.04438	10.8233	1.17079			142.863	1.28572
2.95	30.37	2.05525	10.8167	1.19878			142.913	1.28468
3.02	29.7467	2.24311	10.4567	1.31093			142.997	1.20185
3.1	29.3467	2.32484	9.83667	1.23957			142.883	1.24035
3.17	29.27	2.09215	9.86667	1.20734			142.857	1.32268
3.24	28.95	2.11899	10.1333	1.40504			142.947	1.31322
3.31	28.5667	2.05791	9.80667	1.13772			143.037	1.28791
3.38	28.1633	1.94397	9.81333	1.15939			143.067	1.26244
3.46	27.7667	1.95555	8.90333	1.44827			142.883	1.29309
3.53	27.51	1.95308	6.87333	2.14431			142.983	1.32255
3.6	27.21	1.81671	7.29667	2.12861			142.9	1.29326
3.67	26.7733	1.8087	6.64333	2.10702			142.97	1.22202
3.74	26.28	1.6749	5.92667	2.16561			142.93	1.30067
3.82	26.0667	1.62446	5.61333	2.43932			142.91	1.29585
3.89	25.1333	2.03478					142.927	1.3412
3.96	25.53	1.48253					142.92	1.26083
4.03	25.0467	1.36842					142.943	1.27138
4.1	24.8	1.43057					142.94	1.30296
4.18	24.4367	1.37203					142.867	1.25215
4.25	24.0933	1.21642					142.99	1.29317
4.32	23.74	1.05025					142.92	1.28103
4.39	23.46	0.965108					142.937	1.29949
4.46	22.56	0.428525					142.947	1.24606
4.54	22.6	0.921466					142.91	1.27988
4.61	22.3067	0.849045					142.867	1.26349
4.68	22.0933	0.825274					142.95	1.30715
4.75	21.8	0.891516					142.897	1.22857
4.82	21.4367	0.85989					142.883	1.20457
4.9	20.8967	0.473298					142.937	1.22455
4.97	21.11	0.911501					142.903	1.24978
5.04	20.6867	1.01261					142.933	1.29843
5.11	20.5333	1.14731					142.957	1.27668
5.18	20.1867	0.952284					142.867	1.2406
5.26	19.9867	0.884314					142.85	1.24069
5.33	19.7733	0.836587					142.873	1.29185
5.4	19.5967	0.832152					142.917	1.25847
5.47	19.1733	0.888451					142.937	1.32793
5.54	19.1367	0.792808					142.903	1.24494
5.62	18.9867	0.773743					142.963	1.26899
5.69	18.9533	0.914646					142.977	1.26387
5.76	18.64	0.761512					142.937	1.26203
5.83	18.47	0.784368					142.963	1.29751
5.9	18.1967	0.673606					142.88	1.25914
5.98	18.15	0.659874					142.863	1.24727
6.05	17.85	0.644851					142.94	1.29325
6.12	17.6467	0.628075					142.933	1.27112
6.19	15.98	1.99315					142.957	1.23965
6.26	17.2333	0.83091					142.96	1.25914
6.34	16.9133	0.749452					142.97	1.3095
6.41	16.8	0.777196					142.923	1.28585
6.48	15.1	1.74473					142.953	1.25375
6.55	15.05	1.81827					142.92	1.24649
6.62	14.83	1.77399					142.917	1.28013
6.7	14.5633	1.68701					142.96	1.29423
6.84	14.3067	1.6478					142.917	1.26568
6.91	13.94	1.61344					142.927	1.29304
6.98	14.03	1.53122					142.91	1.27996
7.06	13.8167	1.51647					142.86	1.25044
7.13	13.8633	1.65415					142.933	1.26354
7.2	13.5733	1.52447					142.917	1.28991
7.27	13.4333	1.45424					142.91	1.28099
7.34	12.9733	1.53851					142.843	1.2646
7.41	12.8267	1.52562					142.887	1.257
7.49	13.01	1.43899					142.233	1.71228
7.56	12.8333	1.41657					142.863	1.29411
7.63	12.7767	1.4601					142.93	1.32349
7.7	12.64	1.461					142.94	1.321
7.77	12.5567	1.5319					142.917	1.32353
7.85	12.7033	1.60261					142.877	1.27281
7.92	12.3733	1.53879					142.993	1.3198
7.99	12.2833	1.52984					142.9	1.32378
8.06	12.2667	1.55596					142.92	1.32455
8.78	11.5667	1.7032					143.01	1.32685
8.85	11.6433	1.71834					142.87	1.31761
8.93	11.4133	1.63333					142.88	1.28535
9	11.04	1.77103					142.95	1.28969
9.07	10.78	1.66314					142.913	1.30453
9.21	10.9467	1.43446					142.993	1.27567
9.29	10.7367	1.40803					142.937	1.25367
9.5	10.5567	1.36499					142.913	1.28639
							142.947	1.25887
							142.8	1.24712
							142.93	1.27996
							142.953	1.29038
							142.877	1.28136
							142.883	1.23964
							142.857	1.3008
							142.87	1.25588
							142.88	1.26028
							142.883	1.2671
							142.873	1.25039
							142.897	1.24277
							142.843	1.28214
							142.88	1.25636
							142.87	1.20785
							142.883	1.26788
